2016\_1107

1

1 **Neurons in the inferior temporal cortex of macaque monkeys are sensitive to**  
2 **multiple surface features from natural objects**

3

4 **Hiroshi Tamura<sup>1,2</sup>, Haruki Otsuka<sup>1</sup> and Yukako Yamane<sup>1,2</sup>**

5

6 <sup>1</sup>Graduate School of Frontier Biosciences, Osaka University, Suita, Osaka 565-0871, Japan

7 <sup>2</sup>Center for Information and Neural Networks, Suita, Osaka 565-0871, Japan

8

9 **Corresponding author:**

10 Dr. Hiroshi Tamura

11 Laboratory for Cognitive Neuroscience

12 Graduate School of Frontier Biosciences, Osaka University

13 2A1, Center for Information and Neural Networks

14 1-4 Yamadaoka, Suita, Osaka 565-0871, Japan

15 Tel: +81-6-6879-7969; Fax: +81-6-6879-4439; E-mail: [tamura@fbs.osaka-u.ac.jp](mailto:tamura@fbs.osaka-u.ac.jp)

16

17 **Running title:** IT neurons are sensitive to multiple surface features

18

19

20 **Abstract**

21 Object surfaces contain a variety of visual features that help us to recognize them. To  
22 understand how this information is represented and processed in the brain, we prepared a set of  
23 images from natural object surfaces that maintained surface features but lacked contours. We  
24 examined spiking responses of neurons in the inferior temporal (IT) cortex of monkeys, which  
25 is a crucial structure needed for visual object recognition. About half of IT neurons responded to  
26 surface images with sharp selectivity, indicating that a significant fraction of these neurons  
27 contribute to object surface representation in a sparse manner. Responses of IT neurons were  
28 susceptible to image manipulations, including color removal, removal of luminance contrasts,  
29 and spatial structure degradation. This shows that multiple features are required for IT responses  
30 to surface images. Comparing neuronal response properties among IT, visual area 4 (V4), and  
31 primary visual cortex (V1) revealed properties of IT neurons that differed from those in the  
32 other visual processing regions. Additionally, some neuronal response properties were similar  
33 between IT and V4, but differed from those in V1, indicating that responses of IT neurons to  
34 surface images are constructed by hierarchical processing throughout the ventral visual  
35 pathway.

36  
37 **Keywords:** inferior temporal cortex, material perception, object recognition, primary visual  
38 cortex, V4

39

40 Surfaces of natural objects contain a variety of visual features, such as colors, luminance  
41 contrasts, and spatial patterns. Combinations of these features confer a unique visual appearance  
42 to object surfaces and help us to recognize them. Psychophysical and behavioral studies have  
43 shown that visual features of surfaces contribute to object recognition in humans and monkeys  
44 (Livingstone and Hubel 1987; Price and Humphreys 1988; Cavanagh 1991; Vogels 1999; Coss  
45 and Ramakrishnan 2000; Adelson 2001; Regan et al. 2001; Tanaka et al. 2001; Waitt et al. 2003;  
46 Rossion and Pourtois 2004; Changizi et al. 2006; Fleming et al. 2015).

47 In macaque monkeys, visual object recognition depends on the neural structures of  
48 the ventral visual cortical pathway (Mishkin et al. 1982), at the end of which is the inferior  
49 temporal (IT) cortex. The majority of IT neurons are generally believed to be sensitive to  
50 stimulus shape (Gross et al. 1972; Desimone et al. 1984; Tanaka et al. 1991). However, some  
51 neurons in IT are sensitive to surface-related features, such as colors (Desimone et al. 1984;  
52 Tanaka et al. 1991; Komatsu et al. 1992; Komatsu and Ideura 1993; Tamura and Tanaka 2001;  
53 Edwards et al. 2003; Conway et al. 2007; Harada et al. 2009), textures (homogeneous spatial  
54 patterns; Desimone et al. 1984; Tanaka et al. 1991; Komatsu and Ideura 1993; Wang et al. 2003;  
55 Köteles et al. 2008;), structured spatial patterns (inhomogeneous spatial patterns; Desimone et al.  
56 1984; Tanaka et al. 1991), or three-dimensional structures defined by luminance gradient  
57 (Yamane et al. 2008). These IT neurons may represent a single visual feature and be insensitive  
58 to others. Human functional magnetic resonance imaging (fMRI) studies have found that texture  
59 and colors activate separate regions (Cant et al. 2009; Cavina-Pratesi et al. 2010), suggesting  
60 that individual IT neurons can represent only a single visual feature. Additionally, other  
61 surface-responsive neurons are sensitive to multiple visual features, although the incidence of

62 these neurons has been unknown or small (Desimone et al. 1984; Tanaka et al. 1991; Komatsu  
63 and Ideura 1993).

64 Information derived from the surfaces of natural objects is transferred to IT cortex  
65 through a series of cortical regions, beginning at the primary visual cortex (V1), and continuing  
66 through visual area 2 (V2) and visual area 4 (V4) before reaching IT (see Kravitz et al. 2013, for  
67 a review). Neurons in these preceding regions are also sensitive to colors (Hubel and Wiesel  
68 1968; Zeki 1973; Livingstone and Hubel 1984; Lennie et al. 1990; Schein and Desimone 1990;  
69 Tamura et al. 1996; Johnson et al. 2001; Tootell et al. 2004; Kusunoki et al. 2006; Kotake et al.  
70 2009; Bushnell et al. 2011), textures (Knierim and Van Essen 1992; Arcizet et al. 2008; Freeman  
71 et al. 2013; Okazawa et al. 2015), structured spatial patterns (Gallant et al. 1996), and  
72 three-dimensional structures defined by luminance gradients (Hanazawa and Komatsu 2001).  
73 An as yet unresolved issue is whether surface-sensitive IT neurons simply inherit response  
74 properties from these preceding regions, or if further processing in IT confers them with unique  
75 surface-related response properties.

76 The first aim of the present study was to understand how the surface visual features  
77 derived from natural objects are represented in IT cortex. Although neurons have been shown to  
78 respond to surface-related visual features, quantifying the incidence and stimulus selectivity of  
79 these neurons is important for understanding the representation of these visual features in IT  
80 cortex. To address this issue, we extracellularly recorded spiking responses of single IT neurons  
81 in macaque monkeys. We quantified the incidence and stimulus selectivity of responsive  
82 neurons using a set of images derived from the surfaces of natural objects. The second aim of  
83 the study was to clarify whether the responses of these neurons depended on the presence of

84 multiple visual features, such as color, luminance contrast, and spatial structure. For this, we  
85 examined responses of IT neurons to images in which some of the visual features had been  
86 modified or removed. The third aim was to determine how the visual information derived from  
87 object surfaces is processed in the hierarchically organized ventral visual cortical pathway. In  
88 addition to IT, we therefore recorded spiking responses of single neurons in V4 and V1 to the  
89 same set of images.

90

### 91 **Materials and Methods**

92 We recorded neuronal responses from six monkeys (*Macaca fuscata*; body weight, 5.9–8.6 kg;  
93 Monkeys A, B, C, D, E, and F). We shared these monkeys with other research projects. Because  
94 some of the recording sessions required stable recording for more than an hour, we used an  
95 analgesized and paralyzed preparation. Although analgesia/paralysis might have affected  
96 neuronal activity, any effect was likely immaterial given that stimulus selectivity of V1 and IT  
97 neurons recorded from analgesized/paralyzed monkeys has been shown to be similar to that of  
98 awake-behaving monkeys (Wurtz 1969; Tamura and Tanaka 2001). Because general  
99 experimental procedures were similar to those described previously (Tamura et al. 2014), the  
100 description here will be brief. All experiments were performed in accordance with the  
101 guidelines of the National Institute of Health (1996) and the Japan Neuroscience Society and  
102 were approved by the Osaka University Animal Experiment Committee.

103

### 104 ***Initial preparatory surgery***

105 We prepared monkeys for recordings during an aseptic surgery in which a head restraint was

106 implanted and the lateral and occipital part of the skull over the recording region was covered  
107 with acrylic resin. We performed the surgery under full anesthesia via inhalation of 1%–3%  
108 isoflurane (Forane, Abbott Japan, Tokyo, Japan) in nitrous oxide (70% N<sub>2</sub>O, 30% O<sub>2</sub>) through  
109 an intratracheal cannula. We gave monkeys an antibiotic (Pentacilin, Toyama Chemical, Tokyo,  
110 Japan; 40 mg/kg, i.m.) and an anti-inflammatory and analgesic agent (Voltaren, Novartis, Tokyo,  
111 Japan; or Ketoprofen, Nissin Pharmaceutical, Yamagata, Japan) immediately after the surgery  
112 and continued during the first postoperative week. After 1–2 weeks of recovery, we examined  
113 the eyes to select appropriate contact lenses that allowed images placed 57 cm from the cornea  
114 to be focused on the retina. We took photographs of the retinal fundus to determine the position  
115 of the fovea.

116

#### 117 *Animal preparation for neural recording*

118 On the day of neural recording, we sedated monkeys using intramuscular injections of atropine  
119 sulfate (0.1 mg/kg) and ketamine hydrochloride (12 mg/kg). During preparation, we analgesized  
120 monkeys via inhalation of 1%–3% isoflurane in nitrous oxide (70% N<sub>2</sub>O, 30% O<sub>2</sub>) through an  
121 intratracheal cannula, and infused them with the opioid fentanyl citrate (Fentanest, Daiichi  
122 Sankyo; 0.035 mg/kg/h) in lactated Ringer's solution. We drilled a small hole (~5 mm) in the  
123 resin-covered skull and made a small slit (2 mm) in the dura for electrode insertion. We dilated  
124 the pupil of the eye contralateral to the recording hemisphere and relaxed the monkeys' lenses  
125 using 0.5% tropicamide/0.5% phenylephrine hydrochloride (Mydrin-P, Santen, Osaka, Japan).  
126 We then covered the cornea of the contralateral eye with a contact lens of appropriate refractive  
127 power and curvature, and with an artificial pupil (diameter, 3 mm) so that the eye would focus

128 on images placed 57 cm away. After inserting the recording electrode, we added vecuronium  
129 bromide (Mascalax, MSD, Tokyo, Japan; 0.06 mg/kg/h) to the infusion solution to prevent eye  
130 movements during the recordings of neuronal activity.

131

### 132 *Neural recordings*

133 We made multiple single-unit recordings from IT, V4, and V1 using a single-shaft electrode  
134 with 32 recording probes arranged linearly (A1X32-10 mm 50-413, A1X32-10 mm 100-413;  
135 NeuroNexus, Ann Arbor, MI, USA) or an eight-shaft electrode, with each shaft being a tetrode  
136 having four recording probes at the tip arranged in a rhombus (A8X1 tetrode-2 mm 200-312;  
137 NeuroNexus, Ann Arbor, MI, USA). For the eight-shaft electrode, the centers of adjacent shafts  
138 were separated by 0.2 mm. The distance between the centers of adjacent recording probes was  
139 50  $\mu\text{m}$  or 100  $\mu\text{m}$  when using the single-shaft electrode, and 25  $\mu\text{m}$  when using the eight-shaft  
140 electrode. Because we could observe spiking activity from the same neuron in two or more  
141 adjacent probes, we isolated single neuron activity offline using custom-made software (see  
142 Kaneko et al. 1999; Kaneko et al. 2007; Tamura et al. 2014, for details). After each recording  
143 session, we provided the monkeys analgesics and antibiotics and returned them to their home  
144 cages. Each recording session lasted up to 7 h, and we waited at least a week before the next  
145 recording session in a particular monkey.

146         The recording sites in IT cortex were located between the superior temporal sulcus  
147 and the anterior middle temporal sulcus, and anterior to the posterior middle temporal sulcus.  
148 Those in V4 were located between the superior temporal sulcus and the lunate sulcus, and those  
149 in V1 were located in the surface of the occipital cortex well behind the lunate sulcus.

150

151 ***Visual stimuli***

152 We prepared a stimulus set consisting of 64 images of natural objects (original images; Fig.  
153 1A): stones ( $n = 8$ , #1–8), tree bark ( $n = 8$ , #9–16), leaves ( $n = 8$ , #17–24), flowers ( $n = 8$ ,  
154 #25–32), fruits and vegetables ( $n = 8$ , #33–40), butterfly wings ( $n = 8$ , #41–48), feathers ( $n = 8$ ,  
155 #49–56), and skins and furs ( $n = 8$ , #57–64); and a blank image (#65) that has the same pixel  
156 values as the background. Most images were the outer surface of objects but two (#35 and #36)  
157 were cut surfaces. We selected objects to include a variety of colors, luminance contrasts and  
158 spatial structures. All objects were natural (i.e., not man-made), although the monkeys might  
159 never have seen some of them in their daily lives. The experimenters photographed the images  
160 in indoor and outdoor environments. During the photographing and processing, we enlarged  
161 some images and shrunk others, and therefore the images were not all in the same scale. From  
162 the original photographs, we cut out square images, removing outer contours. All images were  
163  $6^\circ$  in visual angle.

164 Stimulus images were adjusted, evaluated, and manipulated in DKL color space  
165 (Derrington et al. 1984; Fig. 1B). In DKL color space, one axis represents luminance  
166 corresponding to the sum of the outputs of the L- and M-cones (L+M axis), and the other two  
167 axes represent the difference between the outputs from the L- and M-cones (L–M axis) and the  
168 difference between the outputs of the S cones and the sum of the outputs from the L- and  
169 M-cones (S–(L+M) axis). We set the maximum and minimum values in the DKL color space to  
170 +1 and –1, respectively, and used D65 (Commission internationale de l'éclairage; CIE) as the  
171 white point, which was the origin of the coordinate axes of the DKL color space. The average



172 luminance of the stimulus images and the gray background was set to  $-0.8$  of the L+M axis and  
173 was  $12 \text{ cd/m}^2$ .

174 We quantified each image with 31 image-related measures. We obtained 12 image  
175 statistics, one from each of 12 sub-band images (12 filters: three spatial frequencies [8, 16, 32  
176 cycles/image]  $\times$  four orientations [ $0^\circ$ ,  $45^\circ$ ,  $90^\circ$ ,  $135^\circ$ ]) using a wavelet transform (Heeger and  
177 Bergen 1995; Portilla and Simoncelli 2000). Images were transformed to gray scale in the DKL  
178 color space before the wavelet transform. For the output values from each filter, we calculated  
179 the sum of squares for the values and used their logarithms as a measure. We obtained another  
180 seven image statistics from pixel histograms: the standard deviation (SD), skewness, and  
181 kurtosis of luminance (L+M) values across all the pixels, and the mean and SD across all the  
182 pixels' L-M and S-(L+M) values in the DKL color space. We did not use the mean luminance  
183 of the images, because we set it to be the same across images. By applying a two-dimensional  
184 difference of Gaussian filters, we obtained the other 12 image statistics from local color  
185 contrasts (12 filters: four center-surround color combinations [L-M, M-L, S-(L+M),  
186 (L+M)-S]  $\times$  three center-filter diameters [1/16, 1/32, 1/64 of image]; the size of the  
187 surround-filters was 1.6 times the size of the center-filter). For the output values from each filter,  
188 we calculated the sum of squares of the positive values and used their logarithms as a measure.

189 We generated five types of manipulated images. Achromatic images were generated  
190 by setting the L-M and S-(L+M) values of all the pixels to zero (Fig. 1B). Photometrically  
191 isoluminant images were generated by setting the L+M (luminance) values of all pixels equal to  
192 each other and to the background (*i.e.*,  $-0.8$ ; Fig. 1B). Because of the display limitation, L-M  
193 and S-(L+M) values were adjusted to conform to the display if necessary. Pixel-shuffled images

194 (Fig. 1C) were generated by randomly shuffling the x-y position of each pixel. Thus, the pixel  
195 histograms of pixel-shuffled images were equivalent to those of the corresponding original  
196 images, but their spatial structures differed. We generated phase-shuffled images and  
197 texture-synthesized images from achromatic images for technical reasons. Phase-shuffled  
198 images (Fig. 1C) were generated by randomly shuffling the phase of all spatial frequencies and  
199 all orientations of achromatic images. The spatial frequency and orientation contained in  
200 phase-shuffled images were the same as those in the corresponding achromatic images.  
201 Texture-synthesized images (Fig. 1C) were generated with the method developed by Portilla and  
202 Simoncelli (2000) using the MATLAB (MathWorks, MA, USA) toolbox obtained from their  
203 web site (<http://www.cns.nyu.edu/~lcv/texture/>). With this method, we obtained images that  
204 retained the V1-like filter outputs as well as the auto- and cross-correlation values of the filter  
205 outputs from the achromatic images, but had different inhomogeneously structured patterns  
206 (Portilla and Simoncelli 2000).

207

208 **\*\*\*\*\* Figure 1 near here \*\*\*\*\***

209

210 We conducted three types of recording sessions. In the first type, we presented the 64  
211 original images to the IT (Monkeys A, B, and C) and to V4 and V1 (Monkeys A and C). In the  
212 second type, we presented original images, achromatic images, isoluminant images, and  
213 pixel-shuffled images to the IT (Monkeys A, B, and C) and to V4 and V1 (Monkeys A and C).  
214 In the third type, we presented achromatic images, phase-shuffled images, and  
215 texture-synthesized images to the IT and V1 (Monkeys D and F) and to V4 (Monkeys E and F).

216 We presented each visual stimulus for 0.2 s monocularly against a homogeneous gray  
217 background to the eye contralateral to the recording hemisphere and presented the same  
218 homogeneous gray during the 0.2-s intervals between stimulus presentations. The other eye was  
219 closed. For IT neurons, we presented stimuli at the fovea because the receptive fields (RFs) of  
220 IT neurons include the fovea and respond well to the stimuli located there (Gross et al. 1972).  
221 For V4 and V1 neurons, we presented stimuli at the center of the RF that was determined by  
222 audio-monitoring multiunit-activity while stimulating with hand-held circular disks, bars, or  
223 grating patterns. We presented images on a liquid crystal display (CG275W, Eizo, Ishikawa,  
224 Japan), which was regularly calibrated with the internal calibrator and checked with a  
225 spectrometer (Minolta CS-1000, Tokyo, Japan). The luminance values of the white and black  
226 areas were  $125 \text{ cd/m}^2$  and  $1.3 \text{ cd/m}^2$ , respectively. We recorded stimulus onset and offset using a  
227 photodiode attached to the monitor. We repeated 25 or 30 blocks during each recording session  
228 with the stimuli order of each block pseudo-randomized such that each stimulus was presented  
229 once.

230

### 231 *Data analysis*

232 We analyzed the responses of all the recorded and isolated neurons. We computed the  
233 magnitude of a visually evoked response to a given image stimulus as a change in firing rate by  
234 subtracting the spontaneous firing rate during the 0.1-s period immediately preceding the  
235 stimulus from the raw firing rate during the 0.2-s stimulus presentation period. We shifted the  
236 start of the window for the 0.2-s stimulus presentation period to 80 ms after stimulus onset for  
237 IT neurons to compensate for response latency. We evaluated the responsiveness of each neuron

238 by comparing the firing rates during the stimulus presentation period across stimuli ( $P < 0.01$ ,  
239 Kruskal–Wallis test). We determined the statistical significance of a response by comparing the  
240 firing rates during visual stimulation with the firing rates during the 0.1-s period immediately  
241 preceding stimulus ( $P < 0.01$ , Wilcoxon signed-rank test).

242 We evaluated the stimulus selectivity of neurons with a sparseness index (Rolls and  
243 Tovee 1995; Vinje and Gallant 2000; Tamura et al. 2014). We calculated the index with the  
244 following formula:

$$245 \text{ Sparseness Index} = (1 - A)/(1 - 1/n), \text{ where } A = (\sum f_i/n)^2/\sum (f_i^2/n)$$

246 and is the activity fraction,  $f_i$  is the change in firing rate from the spontaneous firing rate  
247 during the stimulus presentation period of the  $i$ -th stimulus.  $f_i$  is the average across trials.  
248 Negative  $f_i$  was set to zero.  $n$  is the number of stimuli. The sparseness index has a range from  
249 zero to one. If a neuron responded to a smaller number of stimuli with higher firing rates, its  
250 sparseness index was closer to 1. If it responded to almost all stimuli with similar firing rates, its  
251 sparseness index was closer to 0.

252 We assessed a neuron's similarity in stimulus preference between two sets of  
253 responses using Pearson's correlation coefficient. When performing the statistical test for  
254 correlation coefficients, the coefficients were Fisher transformed.

255

## 256 **Results**

### 257 ***Responses of IT, V4, and VI neurons to surface images of natural objects***

258 We recorded the responses of 610 neurons from IT cortex (168 from Monkey A, 145 from  
259 Monkey B, and 297 from Monkey C) to the 64 images of natural object surfaces. We evaluated

260 the responsiveness of each neuron by comparing the firing rates during the  
261 stimulus-presentation period across stimuli ( $P < 0.01$ , Kruskal–Wallis test). Forty-three percent  
262 of these neurons (265/610) were visually responsive (Fig.2). We found responsive neurons in all  
263 electrode penetrations, meaning that they were distributed throughout the lateral gyrus of IT  
264 cortex.

265

266 **\*\*\*\*\* Figure 2 near here \*\*\*\*\***

267

268 Many single IT neurons responded sparsely to the set of 64 surface images. The  
269 neuron in Figure 2A was visually responsive ( $P < 0.01$ , Kruskal–Wallis test). It responded to  
270 four stimuli ( $P < 0.01$ , Wilcoxon signed-rank test) and only one stimulus (#35) evoked strong  
271 responses. We quantified stimulus selectivity using a sparseness index that ranges from zero to  
272 one. Neurons that respond with high firing rates to a small number of stimuli have higher  
273 sparseness indices (i.e., very selective), whereas those that respond with similar firing rates to  
274 almost all stimuli have very low indices (i.e., non-selective). The sparseness index of the neuron  
275 in Figure 2A was 0.91. The stimulus selectivity of the neuron in Figure 2B was also sharp, but  
276 broader than that of the neuron in Figure 2A (sparseness index, 0.67). For comparison, the  
277 neuron in Figure 2C had much broader stimulus selectivity (sparseness index, 0.20).

278 Neurons in V4 and V1 also responded to the set of 64 surface images. We recorded  
279 578 neurons from V4 (222 from Monkey A and 356 from Monkey C) and 890 neurons from V1  
280 (543 from Monkey A and 347 from Monkey C) for this analysis. Among the recorded neurons,  
281 67% of V4 neurons (387/578) and 53% of V1 neurons (474/890) were visually responsive to the

282 images ( $P < 0.01$ , Kruskal–Wallis test; Fig. 3A). The percent of visually responsive neurons  
283 differed among the three cortical areas ( $P < 0.001$ ,  $\chi^2$ -test), with IT cortex having the lowest  
284 incidence of responsive and V4 having the highest. Sparseness indices also differed among the  
285 three cortical areas (median sparseness index: IT, 0.74; V4, 0.75; V1, 0.66;  $P < 0.001$ ,  
286 Kruskal–Wallis test; Fig. 3B). While the sparseness index of IT neurons was similar to that of  
287 V4 neurons, it was larger than that of V1 neurons. This means that stimulus selectivity was  
288 much sharper in IT and V4 neurons than in V1 neurons.

289

290 \*\*\*\*\* **Figure 3 near here** \*\*\*\*\*

291

292 Responses of IT neurons to the surface images of natural objects were independent  
293 from low-level image properties, such as distributions of pixel values, orientation, spatial  
294 frequency, or color contrasts. We quantified each stimulus image with 31 image statistics (seven  
295 statistics from pixel histograms, 12 from sub-band images, and 12 from local color contrasts;  
296 see Materials and Methods for details). We calculated  $r^2$ -values between a neuron's 64  
297 responses (a vector with 64 elements) and one of the statistics (another vector with 64 elements).  
298 By repeating this process for each of the 31 statistics, we obtained 31  $r^2$ -values for each neuron,  
299 and designated a neuron's largest  $r^2$ -value as its representative of  $r^2$ -value. We found that only a  
300 small fraction of IT neurons (12.8%, 34/265) showed significant correlation between the image  
301 statistics and responses. The median  $r^2$ -value for IT neurons was 0.09 ( $n = 265$ ; Fig. 4A and B),  
302 meaning that 9% of responses could be explained with the image statistics. Responses of most  
303 V4 neurons were also nearly independent from the image statistics (median of  $r^2$ -value = 0.08;  $n$

304 = 387; Fig. 4B). In contrast, responses of V1 neurons were weakly related to the image statistics  
305 (median = 0.15;  $n = 474$ ; Fig. 4B). The  $r^2$ -values differed among the three cortical areas ( $P <$   
306 0.001, Kruskal–Wallis test). Thus the simple image statistics explained at least a part of V1  
307 neuronal responses to the surface images of natural objects, whereas they failed to explain the  
308 responses of most IT and V4 neurons.

309

310 \*\*\*\*\* **Figure 4 near here** \*\*\*\*\*

311

### 312 *Responses of IT, V4, and V1 neurons to manipulated surface images of natural objects*

313 Surface images of natural objects contain a variety of visual features, such as color,  
314 luminance-contrast, and spatial structures. To gauge the contribution that each of these features  
315 had on the responsiveness and stimulus preference of neurons exposed to natural surface images,  
316 we recorded responses of single neurons to the original images, achromatic images (Fig. 1B),  
317 isoluminant images (Fig. 1B) and pixel-shuffled images (Fig. 1C, left), respectively. We  
318 examined responses to these manipulated images with another set of 107 neurons from IT (32  
319 from Monkey A, 25 from Monkey B, and 50 from Monkey C), 127 neurons from V4 (84 from  
320 Monkey A and 43 from Monkey C), and 50 neurons from V1 (16 from Monkey A and 34 from  
321 Monkey C). To examine how the stimulus manipulations affect responses, we selected those (35  
322 in IT, 79 in V4 and 34 in V1) that were responsive to the original images ( $P < 0.01$ ,  
323 Kruskal–Wallis test) and showed significant response to the best original image (the one that  
324 induced the largest response,  $P < 0.01$ , Wilcoxon signed-rank test).

325

326 *Responses to achromatic images*

327           A small but significant fraction of IT neurons (34%, 12/35) maintained visual  
328   responsiveness to the achromatic version of the best original images (Fig. 5A–C, black lines and  
329   circles; Fig. 6A). The response magnitudes of IT neurons to the achromatic version were smaller  
330   than those to the best original images ( $P < 0.001$ , Wilcoxon signed-rank test; Fig. 5A and B),  
331   and the mean response magnitude was  $0.37 \pm 0.40$  ( $n = 35$ ; Fig. 6A, middle) when normalized  
332   to the responses to the best original images. Thus, colors augmented, or were crucial, for  
333   responses of IT neurons to surface images of natural objects.

334           To evaluate contributions of color to a neuron's stimulus preference, we examined  
335   the similarity in stimulus preference between the original and achromatic images by calculating  
336   correlation coefficients between the responses associated with each image type. If the two sets  
337   of responses are similar to each other (*i.e.*, a correlation coefficient close to 1), color does not  
338   contribute to the stimulus preference. Analysis showed that the mean correlation coefficient was  
339    $0.33 \pm 0.19$  ( $n = 35$ ) and was different from zero ( $P < 0.001$ , Wilcoxon signed-rank test; Fig. 5C,  
340   black line; Fig. 6A, bottom), meaning that stimulus preferences of IT neurons evaluated with  
341   achromatic images were similar in some way to those evaluated with original images. The  
342   results thus suggest that some part of the stimulus preference exhibited by IT neurons to surface  
343   images of natural objects can be maintained without color information.

344

345                                           \*\*\*\*\* **Figure 5 near here** \*\*\*\*\*

346

347           Most V4 and V1 neurons responded at least weakly to achromatic images, and



348 maintained their stimulus preferences (Fig. 6A). The proportion of neurons, the normalized  
349 response magnitudes, and the similarity in stimulus preference differed among IT, V4, and V1  
350 neurons (proportion of neurons,  $P = 0.001$ ,  $\chi^2$ -test; normalized response magnitudes,  $P < 0.001$ ,  
351 Kruskal–Wallis test; similarity in stimulus preferences,  $P < 0.001$ , Kruskal–Wallis test; Fig. 6A).  
352 Specifically, IT neurons showed smaller proportion of responsive neurons, smaller response  
353 magnitudes, and less correlation than V4 and V1 neurons. Thus, the color contributes to  
354 surface-image responses in IT more than in V4 or V1.

355

356 \*\*\*\*\* **Figure 6 near here** \*\*\*\*\*

357

### 358 *Responses to isoluminant images*

359 Almost all IT neurons lost visual responsiveness to the isoluminant version of the  
360 best original images (Fig. 5A–C, magenta lines and circles; Fig. 6B), and only one neuron  
361 maintaining its visual responsiveness (1/35, 3%; Fig. 6B, top). The response magnitudes were  
362 also smaller than those for the original images ( $P < 0.001$ , Wilcoxon signed-rank test; Fig. 5A  
363 and B), and the mean normalized response magnitude was less than zero ( $-0.14 \pm 0.27$  Fig. 6B,  
364 middle). The mean correlation coefficient between responses to the two types of images was not  
365 different from zero ( $0.04 \pm 0.15$ ;  $P = 0.219$ , Wilcoxon signed-rank test; Fig. 5C, magenta line;  
366 Fig. 6B, bottom). This can be explained by the unresponsiveness to isoluminant images. Thus,  
367 luminance contrast, but not color contrast, was essential for IT neuronal responses to surface  
368 images of natural objects.

369 A similar situation was observed in V4, with only a few neurons maintaining

370 responsiveness to isoluminant images. In contrast, a small but much larger proportion of V1  
371 neurons did respond to isoluminant images (Fig. 6B). Comparing these results across regions  
372 showed that the proportion of visually responsive neurons to isoluminant images differed  
373 among IT, V4, and V1 ( $P = 0.001$ ,  $\chi^2$ -test; Fig. 6B, top), with IT and V4 neurons showing  
374 smaller proportions than V1. The normalized response magnitude and the correlation  
375 coefficients between responses to the original images and isoluminant images did not differ  
376 among the three cortical areas (normalized response magnitude,  $P = 0.081$ , Kruskal–Wallis test,  
377 Fig. 6B, middle; correlation coefficients,  $P = 0.050$ , Kruskal–Wallis test, Fig. 6B, bottom).  
378 Overall, the removal of luminance contrast from the surface images of natural objects  
379 significantly diminished the responses of neurons in all the three cortical areas, and the effect  
380 was much stronger for IT and V4 neurons.

381

### 382 *Responses to pixel-shuffled images*

383           Only two IT neurons (6%, 2/35) maintained their responsiveness to the pixel-shuffled  
384 version of the best original images (Fig. 5D–F, magenta lines and circles; Fig. 6C). The  
385 response magnitudes of IT neurons to pixel-shuffled images were smaller than those to the best  
386 original images ( $P < 0.001$ , Wilcoxon signed-rank test; Fig. 5D and E), and the mean  
387 normalized response magnitude was almost zero ( $0.01 \pm 0.37$ ; Fig. 6C, middle). The mean  
388 correlation coefficient between responses to the original images and pixel-shuffled images was  
389 almost zero ( $0.08 \pm 0.12$ ; Fig. 5F; Fig. 6C, bottom), although it was statistically greater than  
390 zero ( $P = 0.001$ ).

391           While most V4 neurons also lost visual responsiveness to pixel-shuffled images, a

392 large fraction of V1 neurons responded to pixel-shuffled images and maintained stimulus  
393 preferences (Fig. 6C). The proportion of responsive neurons and the normalized response  
394 magnitude to pixel-shuffled images differed among IT, V4, and V1 (proportion of neurons,  $P <$   
395  $0.001$ ,  $\chi^2$ -test; response magnitudes,  $P = 0.001$ , Kruskal–Wallis test; Fig. 6C, top, middle). The  
396 correlation coefficient between responses to the original images and pixel-shuffled images also  
397 differed among brain regions ( $P < 0.001$ , Kruskal–Wallis test; Fig. 6C, bottom). Pixel-wise  
398 spatial structures of the surface images of natural objects were essential for responses of most IT  
399 and V4 neurons. In contrast, the shape of pixel histograms, which was maintained in  
400 pixel-shuffled images, could explain a part of V1 neuronal responses.

401

#### 402 *Responses to phase-shuffled images*

403 To further evaluate contributions of spatial structures, we examined responses of  
404 neurons to phase-shuffled and texture-synthesized images. Because phase-shuffled and  
405 texture-synthesized images were generated from achromatic images (for technical reasons), we  
406 compared responses between the best achromatic images and their corresponding  
407 phase-shuffled and texture-synthesized images. Phase-shuffled images retained spatial  
408 frequency and orientation components of achromatic images, but had different spatial phases  
409 (Fig. 1C, center). Texture-synthesized images retained V1-like filter outputs and local  
410 second-order image statistics, but had different inhomogeneously structured patterns (Fig. 1C,  
411 right).

412 We recorded responses from 259 IT neurons (65 from Monkey D and 194 from  
413 Monkey F), 165 V4 neurons (38 from Monkey E and 127 from Monkey F) and 91 V1 neurons

414 (22 from Monkey D and 69 from Monkey F). We restricted analyses to 38 neurons in IT, 84  
415 neurons in V4, and 57 neurons in V1 that were responsive to achromatic images ( $P < 0.01$ ,  
416 Kruskal–Wallis test) and showed significant response to the best achromatic image (the one that  
417 induced the largest response,  $P < 0.01$ , Wilcoxon signed-rank test).

418 All IT neurons lost responsiveness to phase-shuffled version of the best achromatic  
419 images (Fig. 5G–I, black lines and circles; Fig. 6D), and the mean normalized response  
420 magnitude was almost zero ( $-0.01 \pm 0.27$ ; Fig. 6D, middle). The mean correlation coefficient  
421 between responses to achromatic images and phase-shuffled images was not different from zero  
422 ( $0.02 \pm 0.12$ ;  $P = 0.357$ , Wilcoxon signed-rank test; Fig. 5I, black line; Fig. 6D, bottom), as  
423 expected from the unresponsiveness.

424 A small number of V4 and V1 neurons maintained visual responsiveness and  
425 preference to phase-shuffled images (Fig. 6D), and their proportions did not differ among IT, V4,  
426 and V1 ( $P = 0.017$ ,  $\chi^2$ -test; Fig. 6D, top). However, the mean normalized response magnitude to  
427 phase-shuffled images ( $P = 0.005$ , Kruskal–Wallis test; Fig. 6D, middle) and the correlation  
428 coefficient between responses to achromatic images and phase-shuffled images ( $P < 0.001$ ,  
429 Kruskal–Wallis test; Fig. 6D, bottom) did differ across regions. Thus, the importance of spatial  
430 phase was larger in IT than in V4 and V1.

431

#### 432 *Responses to texture-synthesized images*

433 A small fraction (13%, 5/38) of IT neurons maintained responsiveness to the  
434 texture-synthesized version of the best achromatic images whose inhomogeneously structured  
435 patterns were different from the original images (Fig. 5G–I, magenta lines and circles; Fig. 6E).

436 The response magnitudes were smaller than those to achromatic images ( $P < 0.001$ , Wilcoxon  
437 signed-rank test; Fig. 5G and H), and the mean normalized response magnitude was  $0.14 \pm 0.43$   
438 (Fig. 6E, middle). The correlation coefficient between responses to achromatic images and  
439 texture-synthesized images was  $0.16 \pm 0.18$ , which was different from zero ( $P < 0.001$ ; Fig. 5I,  
440 magenta line; Fig. 6E, bottom). Presence of neurons responsive to texture-synthesized images  
441 suggests the importance of spatial structures captured in the V1-like filter outputs and local  
442 second-order image statistics for the responses of IT neurons. At the same time, since many  
443 neurons decreased responsiveness, inhomogeneously structured patterns, which were modified  
444 in the texture-synthesized images from the original, were important for the responses of IT  
445 neurons to surface images of natural objects.

446           Much larger fractions of V4 and V1 neurons maintained visual responsiveness and  
447 stimulus preference to texture-synthesized images. The proportions of responsive neurons and  
448 the normalized response magnitude to texture-synthesized images differed among IT, V4, and  
449 V1 (proportion of neurons,  $P = 0.001$ ,  $\chi^2$ -test; Fig. 6E, top; response magnitudes,  $P < 0.001$ ,  
450 Kruskal–Wallis test; Fig. 6E, middle). The correlation coefficients between responses to  
451 achromatic images and texture-synthesized images also differed across regions ( $P < 0.001$ ,  
452 Kruskal–Wallis test; Fig. 6E, bottom). Thus, contributions of spatial structures that can be  
453 represented with local second-order image statistics were larger for V4 and V1 neuronal  
454 responses to surface images of natural objects than they were for IT neurons.

455

#### 456 ***Relationships between responses to different types of manipulated surface images***

457 Finally, we examined how the effect of one type of image manipulation related to that of

458 another type of manipulation. If visual features themselves or their neural representations are  
459 related to each other, the effects of different image manipulations should also be related. We  
460 evaluated these relationships by correlating the responses of neurons to manipulated images of  
461 different types. We presented three types of manipulated images to one set of neurons, resulting  
462 in three pairs for comparison, and two types of manipulated images to another set of neurons,  
463 resulting in a fourth pair for analysis.

464 In IT, responses to isoluminant images correlated positively with those to  
465 pixel-shuffled images ( $r = 0.47$ ,  $P = 0.005$ ; Fig. 7A, top-right). These results indicated that  
466 neurons that received luminance contrast-based information also received pixel-wise spatial  
467 information, and vice versa. There were no significant correlations in any of the other response  
468 pairs in IT neurons ( $P \geq 0.01$ ). In V4, responses to phase-shuffled images positively correlated  
469 with those to texture-synthesized images ( $r = 0.31$ ,  $P = 0.004$ ; Fig. 7B, middle), meaning that  
470 V4 neurons that responded to phase-shuffled images also responded to texture-synthesized  
471 images. There were no significant correlations in any of the other response pairs in V4 neurons  
472 ( $P \geq 0.01$ ). Responses of V1 neurons to achromatic images were negatively correlated with  
473 those to isoluminant images ( $r = -0.57$ ,  $P < 0.001$ ; Fig. 7A, bottom-left), meaning that V1  
474 neurons that were tolerant to removal of color were intolerant to removal of luminance-contrast,  
475 and vice versa. V1 responses to isoluminant images were positively correlated with those to  
476 pixel-shuffled images ( $r = 0.78$ ,  $P < 0.001$ ; Fig. 7A, bottom-right), meaning that V1 neurons  
477 that were tolerant to removal of luminance-contrast were also tolerant to pixel shuffling. There  
478 were no significant correlations in any of the other response pairs in V1 ( $P \geq 0.01$ ). These data  
479 show that responses to different types of manipulated surface images did not share common

480 relationships in the three cortical areas, thus indicating that each cortical area integrates these  
481 features in different ways.

482

483 \*\*\*\*\* **Figure 7 near here** \*\*\*\*\*

484

#### 485 **Discussion**

486 In the present study, we examined responses of IT neurons to images of natural object surfaces  
487 and compared them with those of V4 and V1 neurons. We found that about half of IT neurons  
488 responded to the surface images with sharp stimulus selectivity, and that their responses were  
489 independent from simple image statistics. Removal of color, removal of luminance contrasts,  
490 and degradation of spatial structures significantly decreased responses in these IT neurons.  
491 Comparing responses among IT, V4, and V1 revealed that IT and V4 neurons exhibited a  
492 similar degree of stimulus selectivity, which was sharper than that of V1 neurons. V1 neuronal  
493 responses were weakly but significantly correlated to image statistics, whereas response in IT  
494 and V4 were not. In all the three cortical areas, neural responses to modified images were  
495 significantly less than those to the original images, but the degree of reduction differed across  
496 regions. Some types of image modification reduced responses in IT more than in V4 and V1,  
497 whereas others reduced IT and V4 responses more than V1 responses.

498

#### 499 ***Responses of IT neurons to surface images of natural objects***

500 We found that about half of IT neurons responded selectively to surface images of natural  
501 objects. Neurons in IT cortex have repeatedly been shown to respond selectively to shapes

502 (Gross et al. 1972; Desimone et al. 1984; Tanaka et al. 1991), with some even being insensitive  
503 to surface features that define the contour (Sáry et al. 1993). Based on these studies, we  
504 expected that only a small fraction of IT neurons would respond to surface images of natural  
505 objects. However, we found that about half of all the recorded neurons in IT cortex responded to  
506 the images. We recorded responsive neurons in all electrode penetrations made in the lateral  
507 gyrus part of IT cortex. If we had recorded neurons around the superior temporal sulcus or the  
508 anterior middle temporal sulcus, where neurons responsive to surface-related features have been  
509 reported (Komatsu et al. 1992; Köteles et al. 2008), responsiveness might have been even more  
510 prevalent than we found here.

511           In the present study, we found that IT neurons had sharp stimulus selectivity and that  
512 their responses to surface images of natural objects were independent from simple image  
513 statistics. These characteristics can be explained through integration of visual features by single  
514 IT neurons. Indeed, consistent with this, removal or degradation of any visual features reduced  
515 or eliminated the responses of most IT neurons. Integration of simple patterns and colors by  
516 single IT neurons has been reported (Desimone et al. 1984; Tanaka et al. 1991; Komatsu and  
517 Ideura 1993). Here, we extend these findings by showing that most IT neurons that respond to  
518 surface images of natural objects require multiple surface features for their activation.

519           Each visual feature contributed to IT neuronal responses in a different manner. We  
520 found that removal of color reduced response magnitude, but selectivity of some IT neurons was  
521 maintained. In contrast, removing luminance contrast and degrading spatial structures  
522 eliminated responsiveness of most IT neurons. These results suggest that luminance contrast and  
523 spatial structure are essential for IT responses to surface images of natural objects, whereas



524 color serves to augment responses. Because removing color did not alter stimulus preference,  
525 color does not seem to contribute a great deal to stimulus preference in IT neurons responsive to  
526 surface images of natural objects. Rather, stimulus preference of IT neurons to surface images  
527 of natural objects was largely determined by luminance contrast-based spatial structures.

528

529 *Comparisons of responses to surface images of natural objects among IT, V4, and V1*

530 Response properties of IT neurons to surface images of natural objects are likely acquired via  
531 gradual and hierarchical processing in the ventral visual cortical pathway. Comparisons across  
532 regions can reveal the level at which these response properties emerge. For example, the degree  
533 of stimulus selectivity—as quantified by the sparseness index—was lower in V1 neurons than in  
534 V4 or IT neurons. Additionally, the relationship between responsiveness and image statistics  
535 was higher in V1 neurons than in V4 or IT neurons. These properties are thus modified at the  
536 level between V1 and V4. Similarly, responses to isoluminant images and pixel-shuffled images  
537 exhibited less reduction in V1 neurons than in V4 or IT neurons, indicating that the importance  
538 of luminance contrast and pixel-wise spatial structure increases between V1 and V4. Other  
539 response properties appear to be modified between V4 and IT. For example, responses to  
540 achromatic images, phase-shuffled images, and texture-synthesized images exhibited greater  
541 reduction in IT neurons than in V4 or V1 neurons, indicating that the importance of color,  
542 spatial phase, and higher order spatial structures increases between V4 and IT. Thus, selective  
543 responses of IT neurons to surface images of natural objects were constructed not simply by  
544 inheriting the response properties from the preceding areas but by gradual and hierarchical  
545 processing in the ventral pathway. Some changes in response properties along the ventral

546 pathway have been reported (Tanaka et al. 1991; Kobatake and Tanaka 1994; Denys et al. 2004;  
547 Rust and DiCarlo 2012; Goda et al. 2014; Namima et al. 2014), and the present results revealed  
548 that information derived from the surfaces of natural objects is also processed in a hierarchical  
549 manner.

550         One might argue that the differences in response properties among the three cortical  
551 areas arise from differences in RF size in relation to stimulus size. Because the RFs of V1  
552 neurons are significantly smaller than stimulus images, image statistics calculated across whole  
553 images may not accurately represent the image properties within the RF of a V1 neuron. This  
554 discrepancy might lead to underestimation of the correlation between V1 neuronal responses  
555 and the image statistics. It may also result in large reductions in responses to modified images,  
556 which are constructed by referencing the image statistics. However, we found that the  
557 correlation coefficients between V1 responses and the image statistics were not smaller than  
558 those for IT or V4 neurons (see Fig. 4B). The degree to which V1 neurons responded less to  
559 modified images was not larger than that of IT or V4 neurons. These results suggest that the  
560 discrepancy between image statistics and image properties within the small RFs of V1 neurons  
561 was not the cause of the differences in response properties among the three cortical areas,  
562 although we cannot rule out the possibility that the correlations and responses to modified  
563 images were underestimated in V1 neurons, leading us to underestimate the real differences.

564

#### 565 ***Further processing of surface visual features in IT cortex***

566         At the end of the hierarchical processing, visual information about object surfaces  
567 may be integrated with visual information about objects contour, creating representations of

568 objects that is invariant and robust to modification and degradation of visual inputs. In past  
569 studies, one of the authors reported that almost all IT neurons (79%–96%) were visually  
570 responsive to object images that retain both natural outer contours and surface visual features  
571 (Tamura and Tanaka 2001; Tamura et al. 2005; Tamura et al. 2014). In the present study, we  
572 tested visual responsiveness with images that lacked contours but retained surface visual  
573 features. Analysis showed a much lower incidence of responsive neurons (43%). This result  
574 suggests that a population of IT neurons require contour information for their activation, and  
575 that they may integrate contour information with surface-related information. Indeed, some IT  
576 neurons have been shown to be sensitive to both shape and color or textures (Desimone et al.  
577 1984; Tanaka et al. 1991; Komatsu and Ideura 1993; Edwards et al. 2003; Conway et al. 2007;  
578 Köteles et al. 2008), and a human fMRI study has also indicated the possibility that shape is  
579 integrated with surface features in the fusiform gyrus (Cavina-Pratesi et al. 2010).

580           Alternatively, the majority of IT neurons sensitive to contour may not be sensitive to  
581 other features, and contour information might be segregated from surface-related information  
582 within IT. Some studies have reported IT neurons sensitive to shape but insensitive to  
583 surface-related properties (Komatsu and Ideura 1993; Sáry et al. 1993; Köteles et al. 2008).  
584 Human fMRI studies and neuropsychological studies have shown that the lateral occipital  
585 cortex is involved in shape processing, whereas more medial parts are involved in processing  
586 surface-related properties (see Eagleman and Goodale 2009 for a review). We should conduct  
587 more systematic analysis at the single-neuron level to clarify how contour information and  
588 surface-related information are represented in IT cortex.

589

590 **Funding**

591 This work was supported by grants from the Ministry of Education, Culture, Sports, Science  
592 and Technology of Japan (MEXT) (Scientific Research on Innovative Areas “*Shitsukan*”,  
593 JP23135521, JP25135722) and by JSPS KAKENHI (Scientific Research on Innovative Areas  
594 “*Innovative SHITSUKAN Science and Technology*”, JP15H05921) to HT.

595

596 **Note**

597 Thanks to H Takada, Y Inoue, S Ishida, K Kondo, and H Kaneko for technical assistances. Four  
598 monkeys were provided by NBRP “Japanese Monkeys” through the National BioResource  
599 Project of MEXT, Japan.

600

601 *Conflict of Interest:* None to declare.

602

603 **References**

- 604 Adelson EH. 2001. On seeing stuff: the perception of materials by humans and machines. Proc.  
605 SPIE 4299:1–12.
- 606 Arcizet F, Jouffrais C, Girard P. 2008. Natural textures classification in area V4 of the macaque  
607 monkey. Exp Brain Res 189:109-120.
- 608 Bushnell BN, Harding PJ, Kosai Y, Bair W, Pasupathy A. 2011. Equiluminance cells in visual  
609 cortical area V4. J Neurosci 31:12398-12412.
- 610 Cant JS, Arnott SR, Goodale MA. 2009. fMR-adaptation reveals separate processing regions for  
611 the perception of form and texture in the human ventral stream. Exp Brain Res  
612 192:391-405.
- 613 Cavanagh P. 1991. Vision at equiluminance. In: Kulikowski JJ, Murray IJ, Walsh V, editor.  
614 Vision and Visual Dysfunction Volume V: Limits of Vision, FL: MacMillan, p 234-250.
- 615 Cavina-Pratesi C, Kentridge RW, Heywood CA, Milner AD. 2010. Separate processing of  
616 texture and form in the ventral stream: evidence from FMRI and visual agnosia. Cereb  
617 Cortex 20:433-446.
- 618 Changizi MA, Zhang Q, Shimojo S. 2006. Bare skin, blood and the evolution of primate colour  
619 vision. Biol Lett 2: 217–221.
- 620 Conway BR, Moeller S, Tsao DY. 2007. Specialized color modules in macaque extrastriate  
621 cortex. Neuron 56:560-573.
- 622 Coss RG, Ramakrishnan U. 2000. Perceptual aspects of leopard recognition by wild bonnet  
623 macaques (*Macaca radiata*). Behaviour 137: 315–335.
- 624 Denys K, Vanduffel W, Fize D, Nelissen K, Peuskens H, Van Essen D, Orban GA. 2004. The

- 625 processing of visual shape in the cerebral cortex of human and nonhuman primates: a  
626 functional magnetic resonance imaging study. *J Neurosci* 24:2551-2565.
- 627 Derrington AM, Krauskopf J, Lennie P. 1984. Chromatic mechanisms in lateral geniculate  
628 nucleus of macaque. *J Physiol* 357:241-265.
- 629 Desimone R, Albright TD, Gross CG, Bruce C. 1984. Stimulus-selective properties of inferior  
630 temporal neurons in the macaque. *J Neurosci* 4:2051-2062.
- 631 Eagleman DM, Goodale MA. 2009. Why color synesthesia involves more than color. *Trends*  
632 *Cogn Sci* 13:288-292.
- 633 Edwards R, Xiao D, Keysers C, Földiák P, Perrett D. 2003. Color sensitivity of cells responsive  
634 to complex stimuli in the temporal cortex. *J Neurophysiol* 90:1245-1256.
- 635 Fleming RW, Gegenfurtner KR, Nishida S. 2015. Visual perception of materials: the science of  
636 stuff. *Vision Res* 109:123-124.
- 637 Freeman J, Ziemba CM, Heeger DJ, Simoncelli EP, Movshon JA. 2013. A functional and  
638 perceptual signature of the second visual area in primates. *Nat Neurosci* 16:974-981.
- 639 Gallant JL, Connor CE, Rakshit S, Lewis JW, Van Essen DC. 1996. Neural responses to polar,  
640 hyperbolic, and Cartesian gratings in area V4 of the macaque monkey. *J Neurophysiol* 76:  
641 2718-2739.
- 642 Goda N, Tachibana A, Okazawa G, Komatsu H. 2014. Representation of the material properties  
643 of objects in the visual cortex of nonhuman primates. *J Neurosci* 34:2660-2673.
- 644 Gross CG, Rocha-Miranda CE, Bender DB. 1972. Visual properties of neurons in  
645 inferotemporal cortex of the macaque. *J Neurophysiol* 35:96-111.
- 646 Hanazawa A, Komatsu H. 2001. Influence of the direction of elemental luminance gradients on

- 647 the responses of V4 cells to textured surfaces. *J Neurosci* 21:4490-4497.
- 648 Harada T, Goda N, Ogawa T, Ito M, Toyoda H, Sadato N, Komatsu H. 2009. Distribution of  
649 colour-selective activity in the monkey inferior temporal cortex revealed by functional  
650 magnetic resonance imaging. *Eur J Neurosci* 30:1960-1970.
- 651 Heeger DJ, Bergen JR. 1995. Pyramid-based texture analysis/synthesis. In: Cook R, editor.  
652 Proceedings of the 22nd Annual Conference on Computer Graphics and Interactive  
653 Techniques, ACM, p 229–238.
- 654 Hubel DH, Wiesel TN. 1968. Receptive fields and functional architecture of monkey striate  
655 cortex. *J Physiol* 195:215-243.
- 656 Johnson EN, Hawken MJ, Shapley R. 2001. The spatial transformation of color in the primary  
657 visual cortex of the macaque monkey. *Nat Neurosci* 4:409-416.
- 658 Kaneko H, Suzuki SS, Okada J, Akamatsu M. 1999. Multineuronal spike classification based on  
659 multisite electrode recording, whole-waveform analysis, and hierarchical clustering. *IEEE*  
660 *Trans Biomed Eng* 46:280-290.
- 661 Kaneko H, Tamura H, Suzuki SS. 2007. Tracking spike-amplitude changes to improve the  
662 quality of multineuronal data analysis. *IEEE Trans Biomed Eng* 54:262-272.
- 663 Knierim JJ, Van Essen DC. 1992. Neuronal responses to static texture patterns in area V1 of the  
664 alert macaque monkey. *J Neurophysiol* 67:961-980.
- 665 Kobatake E, Tanaka K. 1994. Neuronal selectivities to complex object features in the ventral  
666 visual pathway of the macaque cerebral cortex. *J Neurophysiol* 71:856-867.
- 667 Komatsu H, Ideura Y, Kaji S, Yamane S. 1992. Color selectivity of neurons in the inferior  
668 temporal cortex of the awake macaque monkey. *J Neurosci* 12:408-424.

- 669 Komatsu H, Ideura Y. 1993. Relationships between color, shape, and pattern selectivities of  
670 neurons in the inferior temporal cortex of the monkey. *J Neurophysiol* 70:677-694.
- 671 Kotake Y, Morimoto H, Okazaki Y, Fujita I, Tamura H. 2009. Organization of color-selective  
672 neurons in macaque visual area V4. *J Neurophysiol* 102:15-27.
- 673 Köteles K, De Mazière PA, Van Hulle M, Orban GA, Vogels R. 2008. Coding of images of  
674 materials by macaque inferior temporal cortical neurons. *Eur J Neurosci* 27:466-482.
- 675 Kravitz DJ, Saleem KS, Baker CI, Ungerleider LG, Mishkin M. 2013. The ventral visual  
676 pathway: an expanded neural framework for the processing of object quality. *Trends Cogn*  
677 *Sci* 17:26-49.
- 678 Kusunoki M, Moutoussis K, Zeki S. 2006. Effect of background colors on the tuning of  
679 color-selective cells in monkey area V4. *J Neurophysiol* 95:3047–3059.
- 680 Lennie P, Krauskopf J, Sclar G. 1990. Chromatic mechanisms in striate cortex of macaque. *J*  
681 *Neurosci* 10:649-669.
- 682 Livingstone MS, Hubel DH. 1984. Anatomy and physiology of a color system in the primate  
683 visual cortex. *J Neurosci* 4:309-356.
- 684 Livingstone MS, Hubel DH. 1987. Psychophysical evidence for separate channels for the  
685 perception of form, color, movement, and depth. *J Neurosci* 7:3416-3468.
- 686 Mishkin M. 1982. A memory system in the monkey. *Philos Trans R Soc Lond B Biol Sci*  
687 298:83-95.
- 688 Namima T, Yasuda M, Banno T, Okazawa G, Komatsu H. 2014. Effects of luminance contrast  
689 on the color selectivity of neurons in the macaque area V4 and inferior temporal cortex. *J*  
690 *Neurosci* 34:14934-14947.



- 691 Okazawa G, Tajima S, Komatsu H. 2015. Image statistics underlying natural texture selectivity  
692 of neurons in macaque V4. *Proc Natl Acad Sci USA* 112:E351-360.
- 693 Portilla JP, Simoncelli EP. 2000. A parametric texture model based on joint statistics of complex  
694 wavelet coefficients. *Int J Comput Vis* 40:49–70.
- 695 Price CJ, Humphreys GW. 1988. The effects of surface detail on object categorization and  
696 naming. *The Quarterly Journal of Experimental Psychology Section A: Human Experimental*  
697 *Psychology*, 41:797-828.
- 698 Regan BC, Julliot C, Simmen B, Vie not F, Charles-Dominique P, Mollon JD. 2001. Fruits,  
699 foliage and the evolution of primate color vision. *Phil Trans R Soc Lond B Biol Sci* 356:  
700 229–283.
- 701 Rolls ET, Tovee MJ. 1995. Sparseness of the neuronal representation of stimuli in the primate  
702 temporal visual cortex. *J Neurophysiol* 73:713-726.
- 703 Rossion B, Pourtois G. 2004. Revisiting Snodgrass and Vanderwart's object pictorial set: the  
704 role of surface detail in basic-level object recognition. *Perception* 33:217-236.
- 705 Rust NC, DiCarlo JJ. 2012. Balanced increases in selectivity and tolerance produce constant  
706 sparseness along the ventral visual stream. *J Neurosci* 32:10170-10182.
- 707 Sáry G, Vogels R, Orban GA. 1993. Cue-invariant shape selectivity of macaque inferior  
708 temporal neurons. *Science* 260:995-997.
- 709 Schein SJ, Desimone R. 1990. Spectral properties of V4 neurons in the macaque. *J Neurosci*  
710 10:3369–3389.
- 711 Tamura H, Kaneko H, Fujita I. 2005. Quantitative analysis of functional clustering of neurons in  
712 the macaque inferior temporal cortex. *Neurosci Res* 52:311-322.

- 713 Tamura H, Sato H, Katsuyama N, Hata Y, Tsumoto T. 1996. Less segregated processing of  
714 visual information in V2 than in V1 of the monkey visual cortex. *Eur J Neurosci*  
715 8:300-309.
- 716 Tamura H, Mori Y, Kaneko H. 2014. Organization of local horizontal functional interactions  
717 between neurons in the inferior temporal cortex of macaque monkeys. *J Neurophysiol*  
718 111:2589-2602.
- 719 Tamura H, Tanaka K. 2001. Visual response properties of neurons in the ventral and dorsal parts  
720 of the macaque inferotemporal cortex. *Cereb Cortex* 11:384-399.
- 721 Tanaka J, Weiskopf D, Williams P. 2001. The role of color in high-level vision. *Trends Cogn Sci*  
722 5:211-215.
- 723 Tanaka K, Saito H-A, Fukada Y, Moriya M. 1991. Coding visual images of objects in the  
724 inferotemporal cortex of the macaque monkey. *J Neurophysiol* 66:170-189.
- 725 Tootell RB, Nelissen K, Vanduffel W, Orban GA. 2004. Search for color 'center(s)' in macaque  
726 visual cortex. *Cereb Cortex* 14:353-363.
- 727 Vinje WE, Gallant JL. 2000. Sparse Coding and decorrelation in primary visual cortex during  
728 natural vision. *Science* 287:1273-1276.
- 729 Vogels R. 1999. Categorization of complex visual images by rhesus monkeys. Part 1:  
730 behavioural study. *Eur J Neurosci* 11:1223-1238.
- 731 Waitt C, Little AC, Wolfensohn S, Honess P, Brown AP, Buchanan-Smith HM, Perrett DI. 2003.  
732 Evidence from rhesus macaques suggests that male coloration plays a role in female primate  
733 mate choice. *Proc Biol Sci* 270:S144-S146.
- 734 Wang Y, Fujita I, Murayama Y. 2003. Coding of visual patterns and textures in monkey inferior

- 735       temporal cortex. Neuroreport 14:453-457.
- 736   Wurtz RH. 1969. Visual receptive fields of striate cortex neurons in awake monkeys. J  
737       Neurophysiol 32:727-742.
- 738   Yamane Y, Carlson ET, Bowman KC, Wang Z, Connor CE. 2008. A neural code for  
739       three-dimensional object shape in macaque inferotemporal cortex. Nat Neurosci  
740       11:1352-1360.
- 741   Zeki SM. 1973. Colour coding in rhesus monkey prestriate cortex. Brain Res 53:422-427.
- 742
- 743

744 **Figure Captions**

745 **Figure 1.** Visual stimuli. **A**, A set of 64 surface images of natural objects (original images). We  
746 numbered stimuli consecutively from left to right and then from top to bottom. Stones (#1–8),  
747 tree bark (#9–16), leaves (#17–24), flowers (#25–32), fruits and vegetables (#33–40), butterfly  
748 wings (#41–48), feathers (#49–56), and skin and fur (#57–64). We included a blank image (#65)  
749 that was the same color (gray) as the background for all the images. **B**, An example achromatic  
750 and isoluminant image. Left: The original image (top), achromatic image (middle) and  
751 isoluminant image (bottom) of a strawberry. Right: Distributions of pixel color values in DKL  
752 color space for the original (cyan), achromatic (black) and isoluminant (magenta) images. Each  
753 pixel has three values in DKL color space:  $L-M$ ,  $S-(L+M)$ , and  $L+M$ . In the graph, horizontal  
754 and vertical axes represent  $L-M$  and  $L+M$ , respectively. The  $S-(L+M)$  axis was not plotted for  
755 visualization purposes. **C**, Examples of images whose spatial structures were manipulated.  
756 Shown are a pixel-shuffled (left), phase-shuffled (center), and texture-synthesized (right) image  
757 of the strawberry.

758

759 **Figure 2.** Responses of IT neurons to 64 surface images of natural objects. **A–C**, Peristimulus  
760 time histograms (PSTHs) showing the responses of three neurons. PSTHs are arranged in the  
761 same order as the stimulus images in Figure 1A and the last PSTH (the bottom left) is for the  
762 blank image. Numbers in italic in eight leftmost PSTHs correspond to the stimulus numbers in  
763 Figure 1A. We plotted firing rates (spikes/s) for 0.5-s periods with a 10-ms bin-width. The  
764 vertical dotted lines within each PSTH indicate stimulus onset (0 s) and offset (0.2 s). Stars in  
765 the PSTHs indicate significant differences between stimulation-induced firing rates and

766 spontaneous firing rates ( $P < 0.01$ , Wilcoxon signed-rank test).

767

768 **Figure 3.** Comparisons of response properties among IT, V4, and V1 neurons. **A**, Proportions of  
769 visually responsive neurons to the surface images of natural objects (IT,  $n = 610$ ; V4,  $n = 578$ ;  
770 V1,  $n = 890$ ). We evaluated the responsiveness of each neuron by comparing the firing rates  
771 during the stimulus presentation period across stimuli ( $P < 0.01$ , Kruskal–Wallis test). **B**,  
772 Box-plot comparison of the sparseness index. Analysis was conducted with visually responsive  
773 neurons (IT,  $n = 265$ ; V4,  $n = 387$ ; V1,  $n = 474$ ). The center of each box is the median, and the  
774 top and bottom of the box are the upper and lower quartiles, respectively. The attached whiskers  
775 connect the most extreme values within 150% of the interquartile range from the end of each  
776 box.

777

778 **Figure 4.** Relationship between responses and image statistics in IT, V4, and V1 neurons. **A**,  
779 Frequency distributions of the coefficients of determination ( $r^2$ ) for the IT neurons. We  
780 calculated  $r^2$ -values between responses and each of the 31 image statistics and plotted the  
781 largest among the 31  $r^2$ -values for each neuron. Filled columns,  $r^2$ -values significantly larger  
782 than those calculated with shuffled responses ( $P < 0.01$ , permutation test, 1,000 times of  
783 randomization). Open columns, non-significant  $r^2$ -values. **B**, Comparison of  $r^2$ -values among IT  
784 ( $n = 265$ ), V4 ( $n = 387$ ), and V1 ( $n = 474$ ) neurons.

785

786 **Figure 5.** Responses of IT neurons to manipulated surface images of natural objects. **A**,  
787 Population PSTHs for original images (cyan), achromatic images (black), and isoluminant

788 images (magenta). We constructed population PSTHs in the following way. For each neuron, we  
789 determined the best original image (the one that induced the largest response), and normalized  
790 the PSTHs with the peak-firing rates. We obtained population PSTHs by averaging the  
791 normalized PSTHs across neurons. We constructed population PSTHs for the achromatic or  
792 isoluminant version of the best original images in the same way but normalized by the  
793 peak-firing rates in the PSTH of the best *original* image. Shades around the line represent the  
794 standard error of the mean. The gray bar on the horizontal axis indicates the stimulus  
795 presentation period (0–0.2 s). **B**, Scatter plot of response magnitudes for the best original  
796 images and the achromatic images (black circles) and for the best original images and the  
797 isoluminant images (magenta circles). The response magnitudes (firing rates) for the best  
798 original images are plotted on the horizontal axis, and those for the corresponding manipulated  
799 images are plotted on the vertical axis. Each circle represents a response pair from a neuron.  
800 Filled and open circles represent statistically significant and non-significant responses to the  
801 manipulated images, respectively. We determined the statistical significance of a response by  
802 comparing the firing rates during visual stimulation with the firing rates during the 0.1-s period  
803 immediately preceding stimulus presentation ( $P < 0.01$ , Wilcoxon signed-rank test). Note that  
804 all responses to the best original images were statistically significant. The diagonal broken line  
805 is the identity line. **C**, Cumulative frequency distribution of the correlation coefficients between  
806 responses to the original images and those to the achromatic images (black) or the isoluminant  
807 images (magenta). **D**, Population PSTHs for the best original images (cyan) and the  
808 corresponding pixel-shuffled images (magenta). **E**, Comparison between response magnitudes  
809 for the best original images and for the pixel-shuffled images. **F**, Cumulative frequency

810 distributions of the correlation coefficients between responses to the original images and to the  
811 pixel-shuffled images. **G**, Population PSTHs for the best achromatic images (cyan), the  
812 corresponding phase-shuffled images (black), and the corresponding texture-synthesized images  
813 (magenta). **H**, Comparison between response magnitudes for the best achromatic images and the  
814 phase-shuffled images (black circles), or the texture-synthesized images (magenta circles). **I**,  
815 Cumulative frequency distribution of the correlation coefficients between responses to the  
816 achromatic images and the phase-shuffled images (black), or the texture-synthesized images  
817 (magenta). Note that phase-shuffled images and texture-synthesized images were achromatic.  
818 We analyzed 35 IT neurons for A–F and another 38 IT neurons for G–I.

819

820 **Figure 6.** Responses to manipulated images in IT, V4, and V1 neurons. Among neurons  
821 responsive to the original images, we compared proportions of neurons responsive to  
822 manipulated images (Top), response magnitudes to manipulated images normalized with those  
823 to the best original images (middle), and correlation coefficients between responses to a set of  
824 manipulated images and those to the original images (bottom). **A–C**, Comparisons of respective  
825 responses to achromatic, isoluminant, and pixel-shuffled images across the three cortical areas.  
826 For A, B and C, we analyzed 35 IT, 79 V4, and 34 V1 neurons. **D–E**, Comparisons of respective  
827 responses to phase-shuffled and texture-synthesized images across the three cortical areas. For  
828 D and E, we analyzed 38 IT, 84 V4, and 57 V1 neurons. Error bars for normalized responses  
829 (middle row) and correlation coefficients (bottom row) are standard deviations. *P*-values from  
830 statistical comparisons among IT, V4, and V1 ( $\chi^2$ -test for proportion of visually responsive  
831 neurons, Kruskal–Wallis test for normalized response magnitudes and for correlation

832 coefficients) are provided in each panel.

833

834 **Figure 7.** Relationships between the responses to different pairs of manipulation type for IT, V4,

835 and V1 neurons. **A**, Response relationship for achromatic vs. isoluminant images (left column),

836 achromatic vs. pixel-shuffled images (middle column), and isoluminant vs. pixel-shuffled

837 images (right column) for IT (top row,  $n = 35$ ), V4 (middle row,  $n = 79$ ), and V1 (bottom row,  $n$

838  $= 34$ ) neurons. For each neuron, we determined the most effective original image. Response

839 magnitudes for the manipulated images were normalized to the corresponding best images.

840 Normalized responses to two types of manipulated image are plotted against each other. Each

841 dot represents data from one neuron. The correlation coefficient is provided in each panel. **B**,

842 Relationships between responses to phase-shuffled and texture-synthesized images for IT (top

843 row,  $n = 38$ ), V4 (middle row,  $n = 84$ ), and V1 (bottom row,  $n = 57$ ) neurons. Here, we

844 normalized response magnitudes for manipulated images to those for the best corresponding

845 achromatic images.



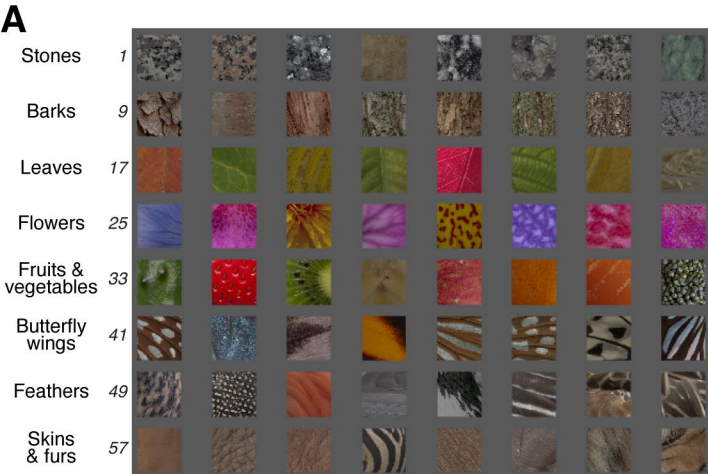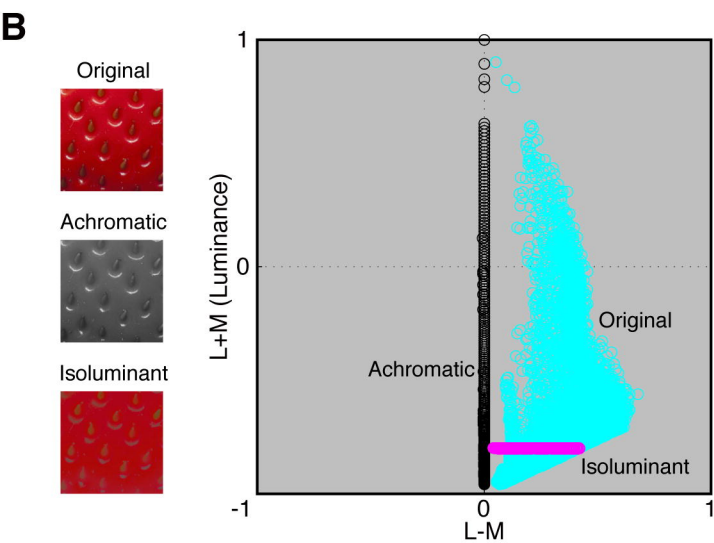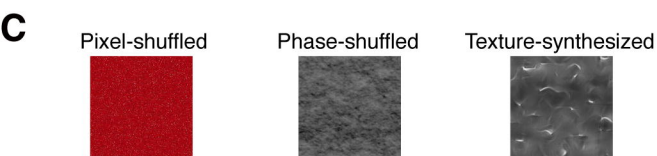

Figure 1  
 Tamura et al.

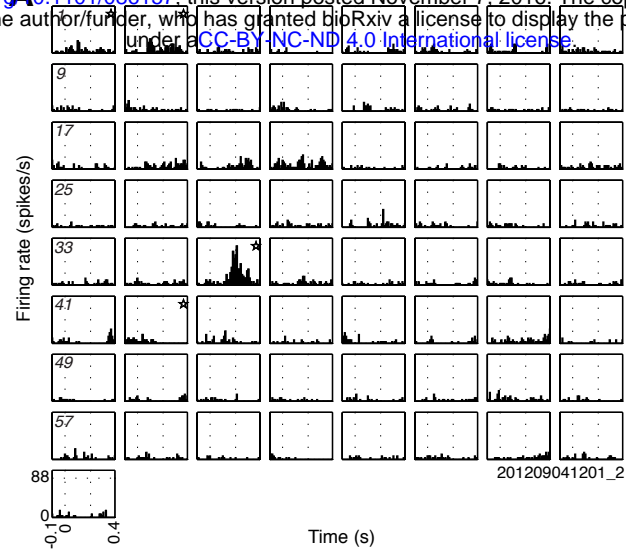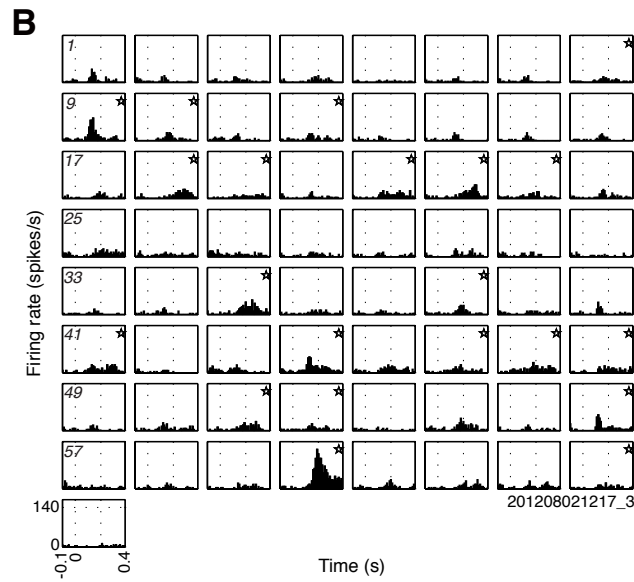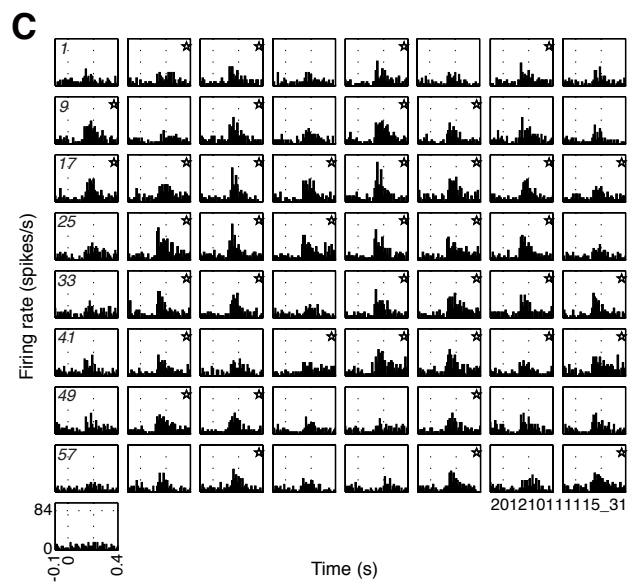

Figure 2  
Tamura et al.

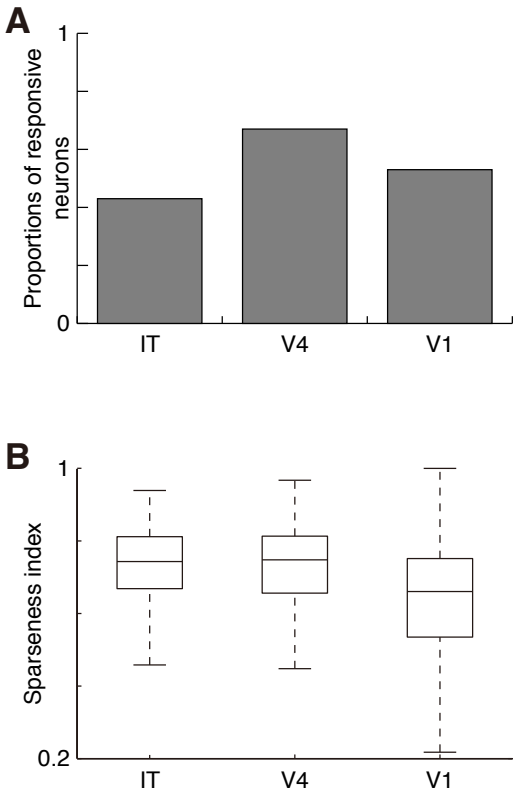

Figure 3  
Tamura et al.

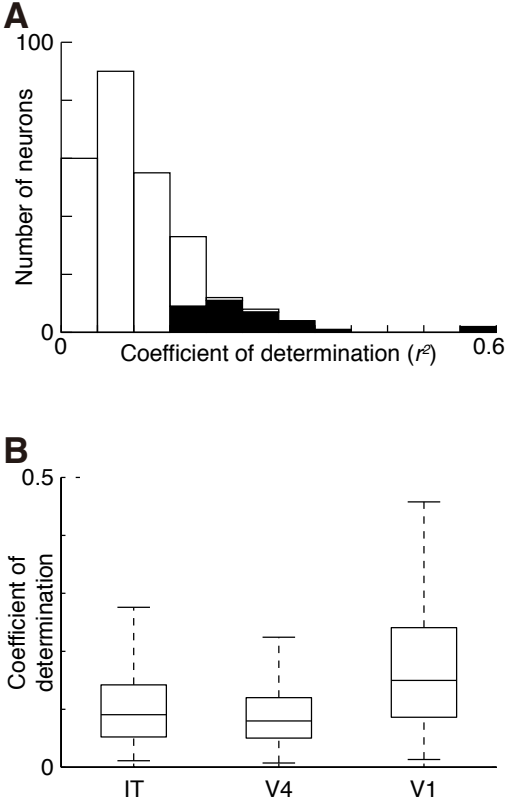

Figure 4  
Tamura et al.

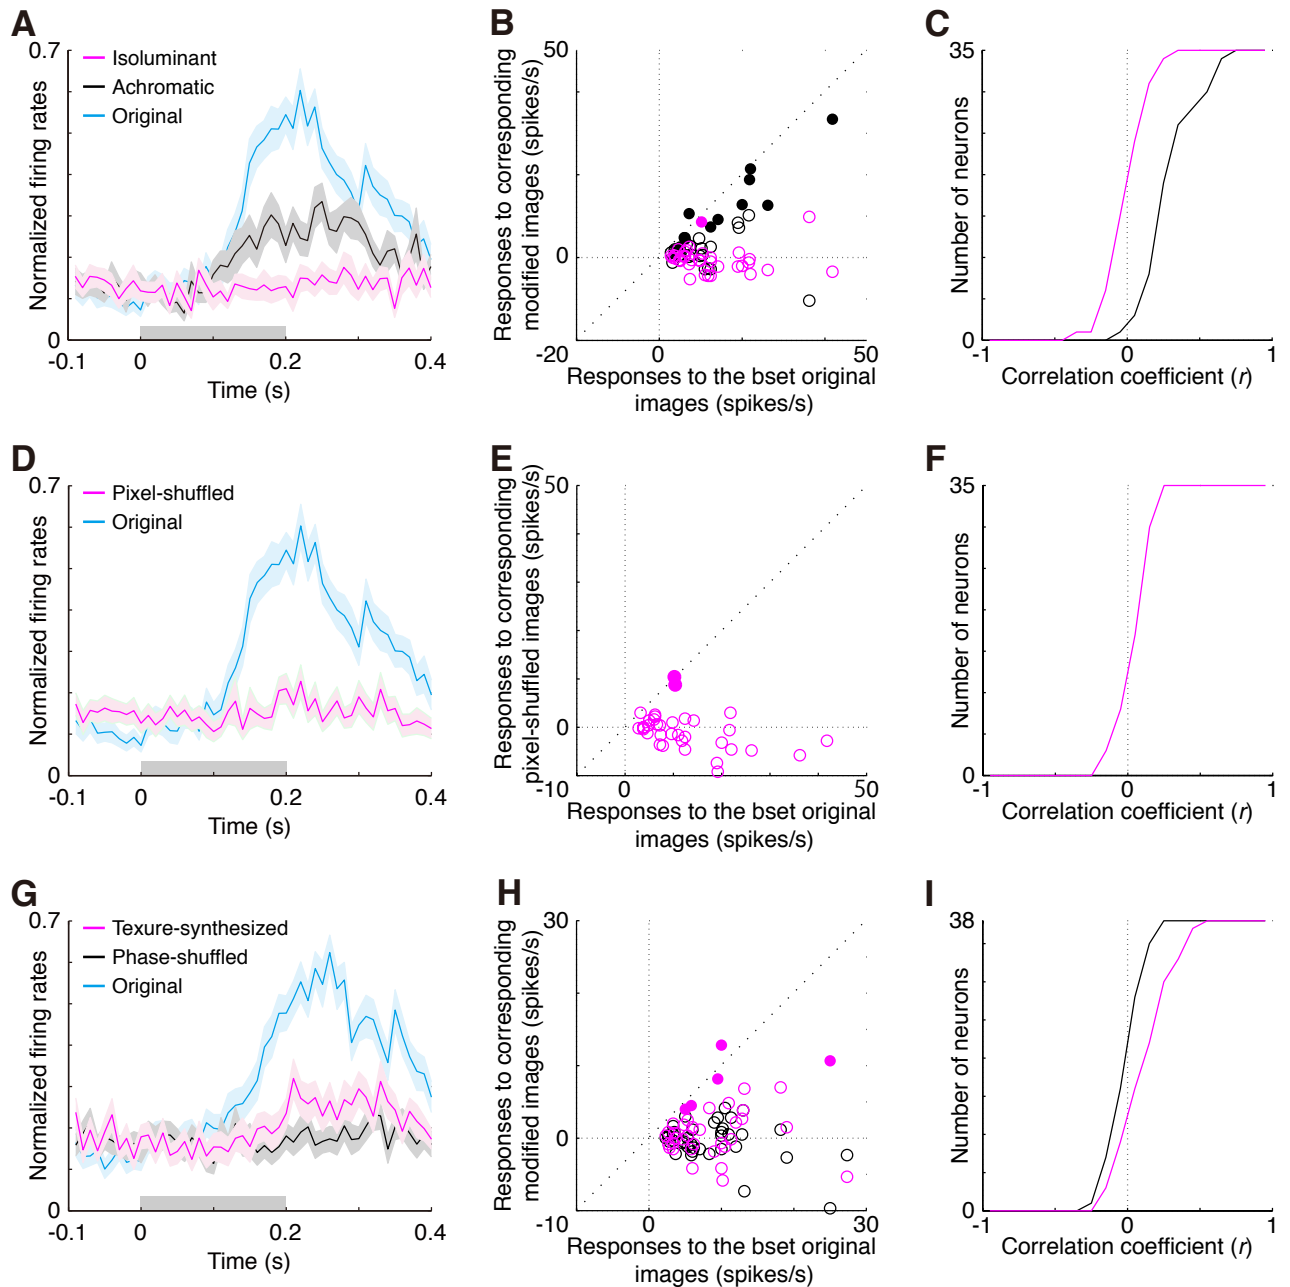

Figure 5  
Tamura et al.

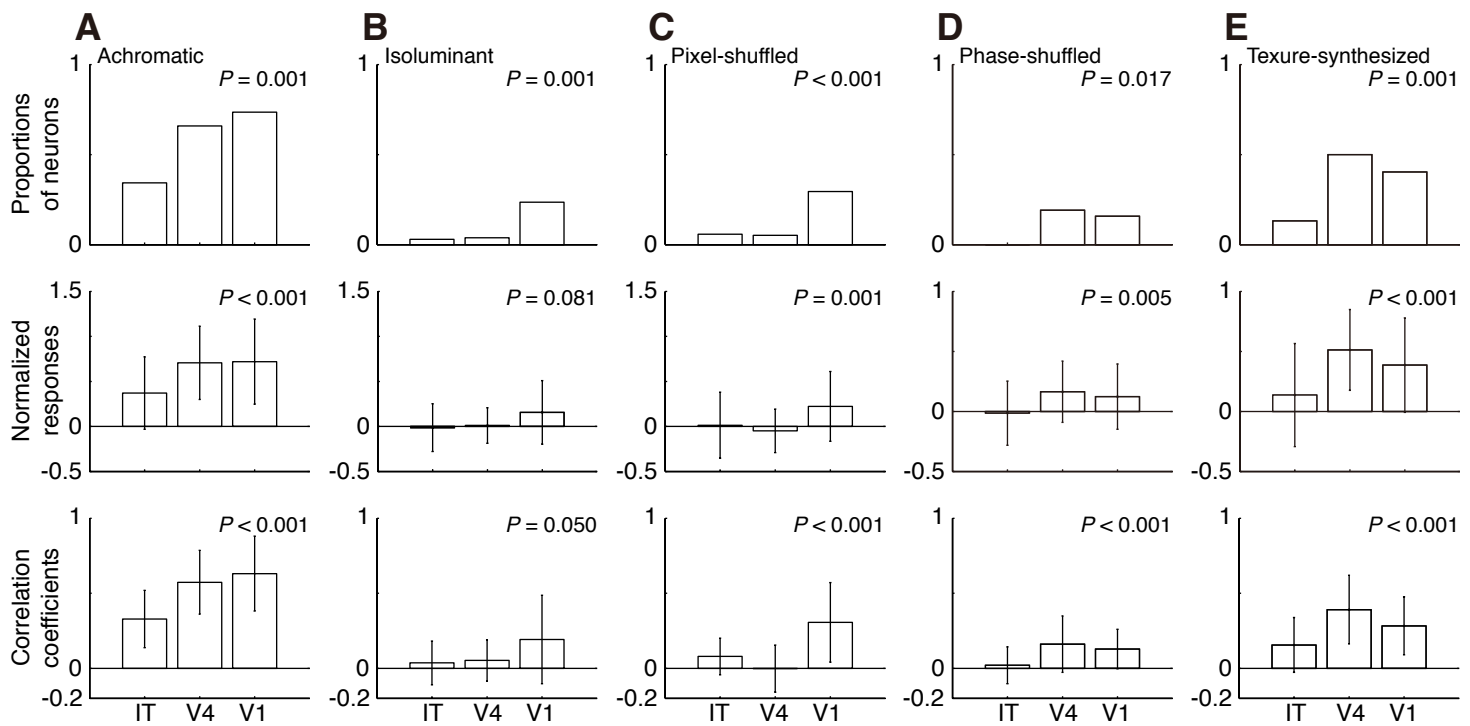

Figure 6  
Tamura et al.

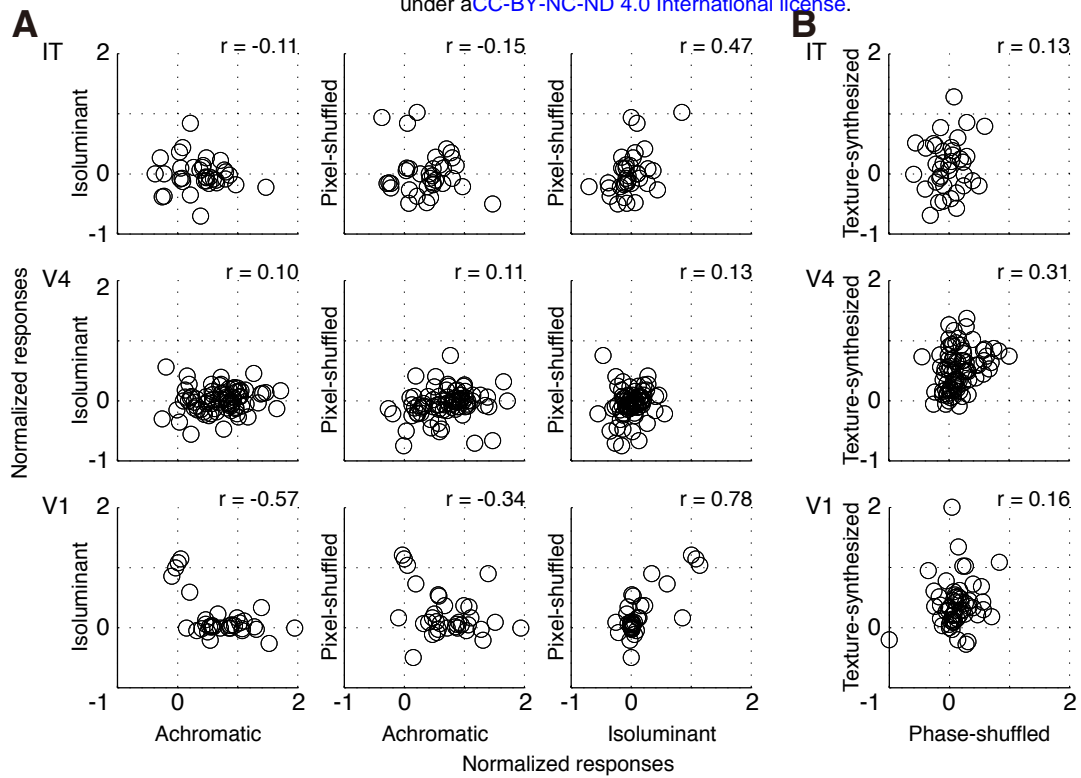

Figure 7  
Tamura et al.
